# Supplementary material for: Customized In Situ Functionalization of Nanodiamonds with Nanoparticles for Composite Carbon-Paste Electrodes
Source: MDPI journal article supplement (doi:10.3390/nano10061179), 2020-06-17
Supplement: s1 [file s1]

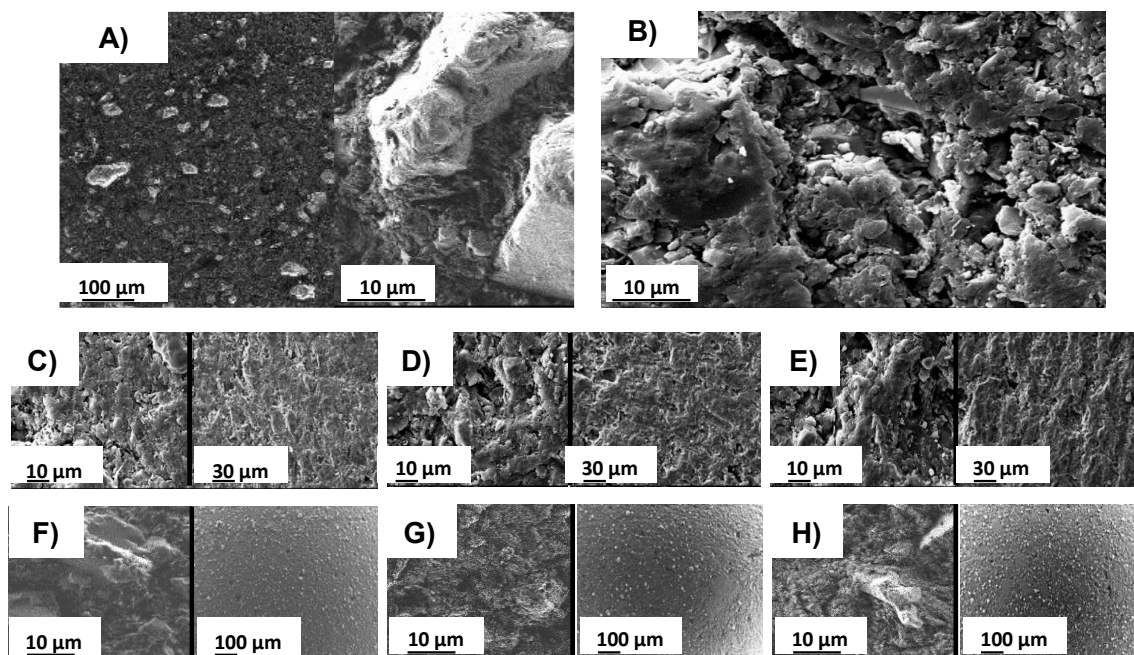

**Figure S1:** SEM images at different magnification levels of the graphite/epoxy electrode (A), the electrode containing 1% NDs (B), the electrodes containing 1%, 2% and 3.5% of Au@NDs (C-E) and the electrodes containing 1%, 2% and 3% of Ag@NDs (F-H).

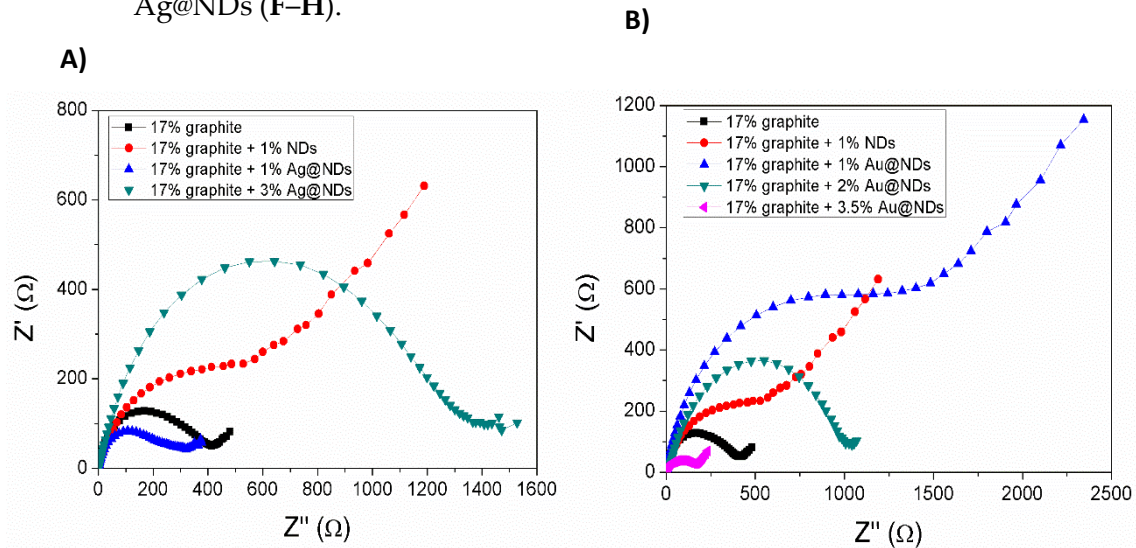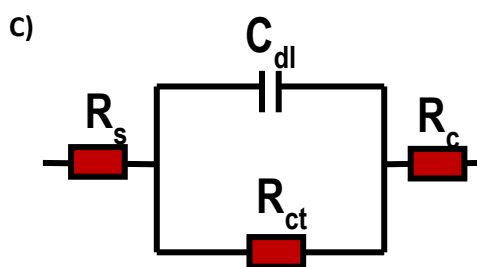

$$R_{\Omega} = R_s + R_c$$

**Figure S2:** Comparison of Nyquist plots for bare electrode, 1% NDs, 1% Ag@NDs, 2% Ag@NDs and 3% Ag@NDs electrodes (A) and bare electrode, 1% NDs, 1% Au@NDs, 2% Au@NDs and 3.5% Au@NDs electrodes (B) in presence of 0.01 M  $\text{Fe}(\text{CN})_6^{3-}/\text{Fe}(\text{CN})_6^{4-}$  under quiescent condition in 0.1 M KCl. Scheme of the equivalent circuit (C) used for the impedance spectra fitting to obtain the electrochemical parameters of ohmic resistance ( $R_\Omega$ ), charge-transfer resistance ( $R_{ct}$ ) and double-layer capacitance ( $C_{dl}$ ).

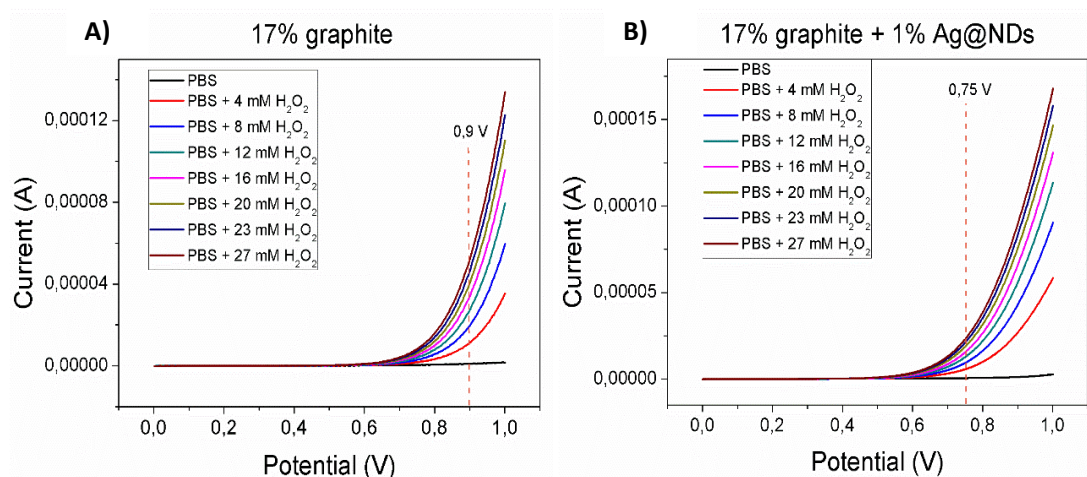

**Figure S3:** Linear sweep voltamperograms obtained each electrode using hydrogen peroxide as analyte in electrolytic medium KCl 0.1 M and phosphate buffer 0.1 M at pH 7.0. 17% graphite (bare electrode) (A) and 17% graphite + 1% Ag@NDs (B). The dashed lines indicate the working potential applied to each electrode.

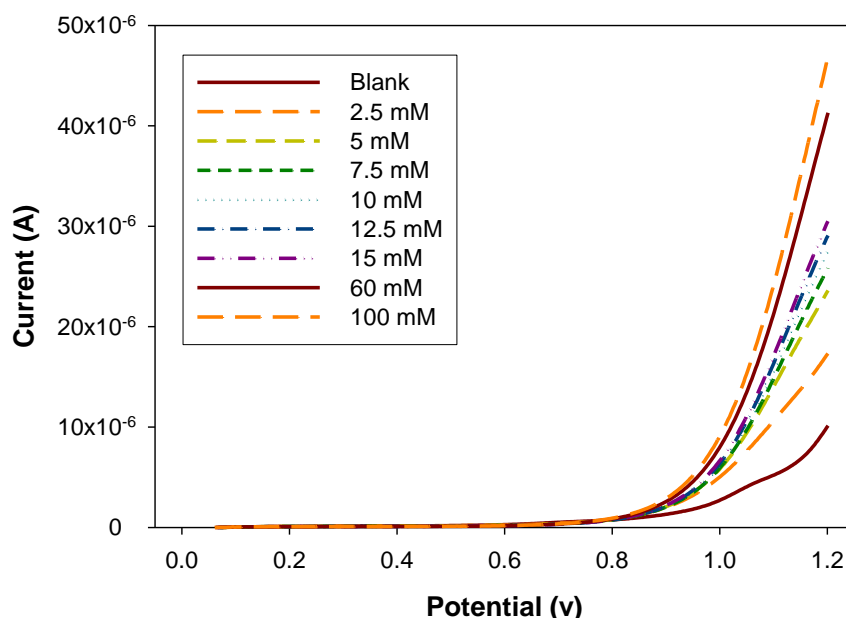

**Figure S4:** Linear sweep voltamperogram obtained for the 1% Ag@NDs electrode modified with GOD in presence of glucose in electrolytic medium KCl 0.1 M and phosphate buffer 0.1 M at pH = 7.0.

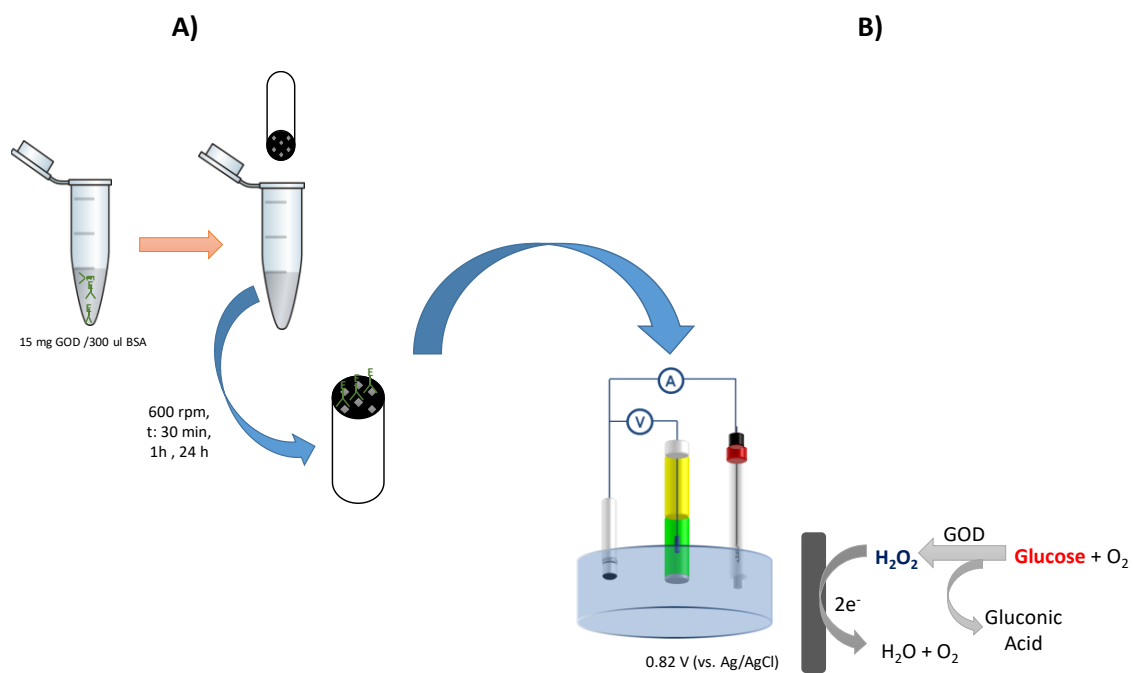

**Figure S5:** Scheme of the analytical procedure and the reaction that takes place on the surface electrode. Incubation step (**A**). The reaction that takes place in two stages: first one the biocatalyst reaction between the glucose oxidase and the glucose by hydrogen peroxidase production, and secondly the electroanalytical reaction when the product is oxidized on surface electrode (**B**).
